# Supplementary material
Source: PubMed Central journal article supplement (PMC4972279)
Supplement: supp_pp.16.00525_PP2016-00525R1_Supplemental_Material.pdf [file supp_pp.16.00525_PP2016-00525R1_Supplemental_Material.pdf]

1 **Supplemental Files**

2

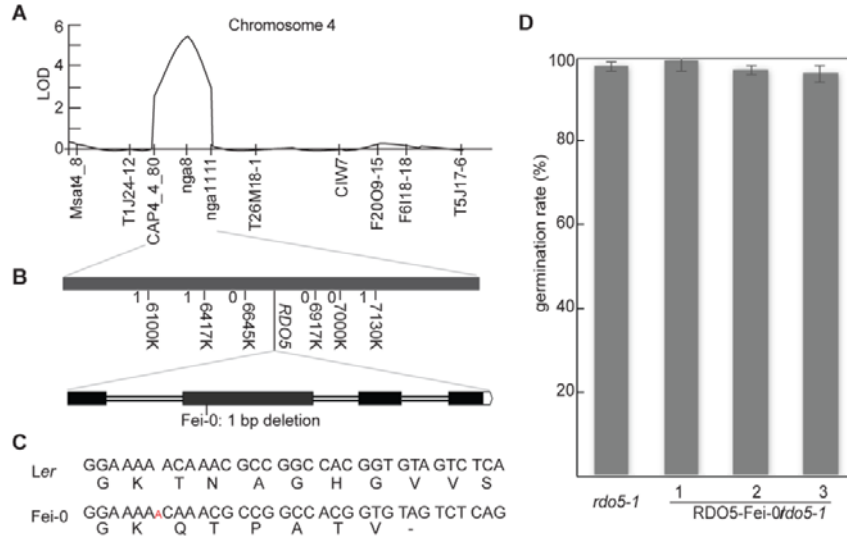

3

4 **Supplemental Figure 1. Map based cloning of *DOG18*.**

5 (A) QTL likelihood map for DSDS50 values of the *Ler*/*Fei-0* RILs. The Y-axis corresponds to the  
6 genetic map of chromosome 4.

7 (B) Fine mapping narrowed the position of *DOG18* down to a 700 kb interval, containing the *RDO5*  
8 gene, between markers 6417K and 7130K. The numbers between the markers indicate number of  
9 recombinants. The lower part of the figure shows the *RDO5* gene (with exons in black) and the  
10 location of a 1 bp deletion in *Fei-0*.

11 (C) The 1 bp deletion in *Fei-0* causes a frame shift and premature stop codon in *RDO5*.

12 (D) Germination of freshly harvested seeds from the *rdo5-1* mutant and transgenic *rdo5-1* lines  
13 containing the *DOG18* *Fei-0* allele. Shown are means  $\pm$  SE of six to eight independent batches of  
14 seeds for each genotype.  
15

16

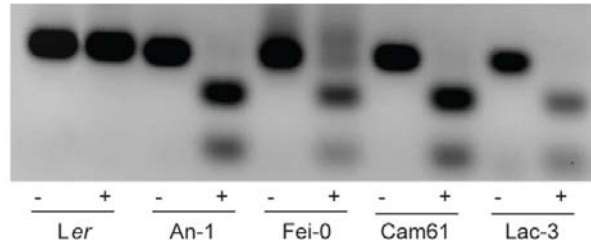

17

18 **Supplemental Figure 2. *DOG18* Fei-0 allele screening.**

19 *DOG18* Fei-0 allele screen of Arabidopsis hapmap accessions. A dCAPs marker is used for  
20 genotyping. A 124bp PCR product was amplified. *DOG18* Fei-0 like alleles can be digested into 84bp  
21 and 40bp by Xmn1 (NEB, USA). -/+ indicate before/after Xmn1 digestion.

22

23

24

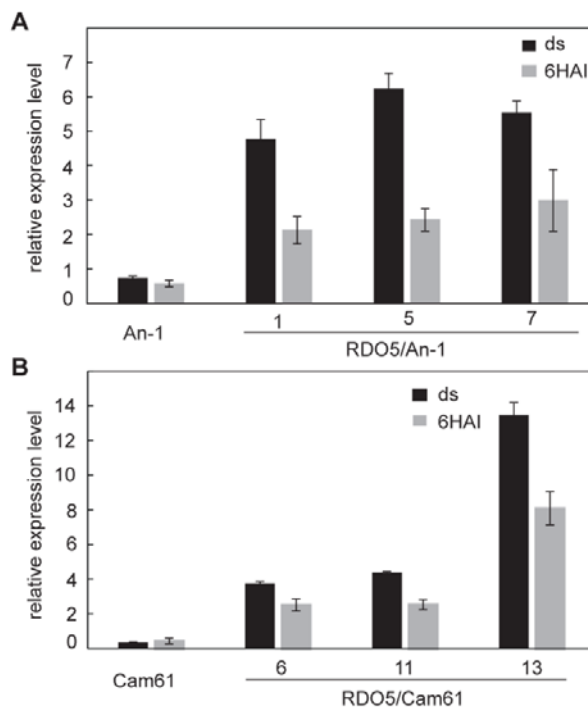

25

26 **Supplemental Figure 3. *RDO5* transcript level detection in transgenic lines.**

27 qRT-PCR analysis of *RDO5* transcript levels in dry and 6HAI seeds from transgenic lines in An-1 (A)  
28 and Cam61 (B) background. The expression values were normalized using *ACT8* as control. n = 3  
29 biological replicates; error bars represent SE.

30

31

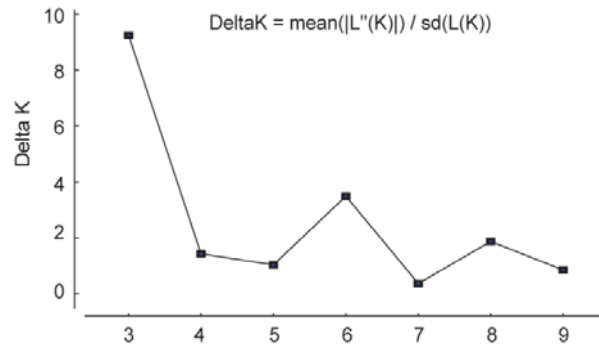

32

33 **Supplemental Figure 4. Structure estimation of populations for K ranging from one to fourteen**  
 34 **by delta K-values.**

35

36

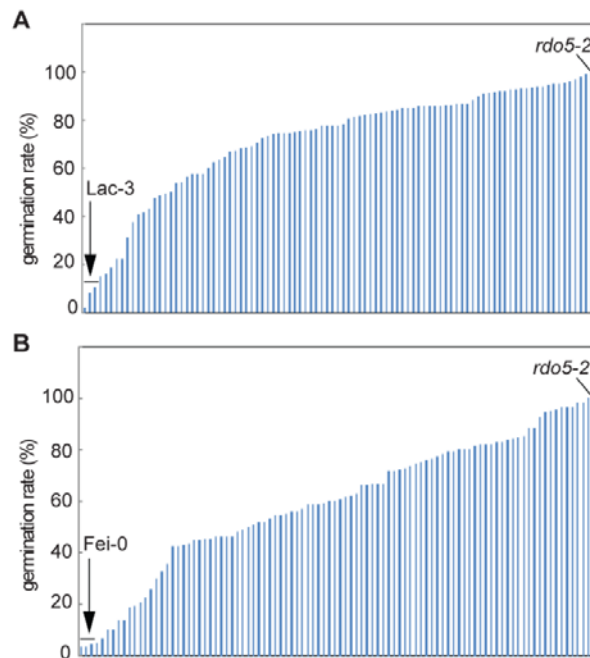

37

38 **Supplemental Figure 5. Germination of *rdo5* segregating populations.**

39 (A) and (B) Germination percentage of freshly harvested seeds from individuals of segregating F2  
 40 progenies from the crosses *rdo5-2* × *Lac-3* (A) and *rdo5-2* × *Fei-0* (B). 96 independent lines were  
 41 analyzed including 4 *Lac-3* (A) or *Fei-0* (B) and 2 *rdo5-2* plants as control. X-axis shows F2 progeny.

42

43

44

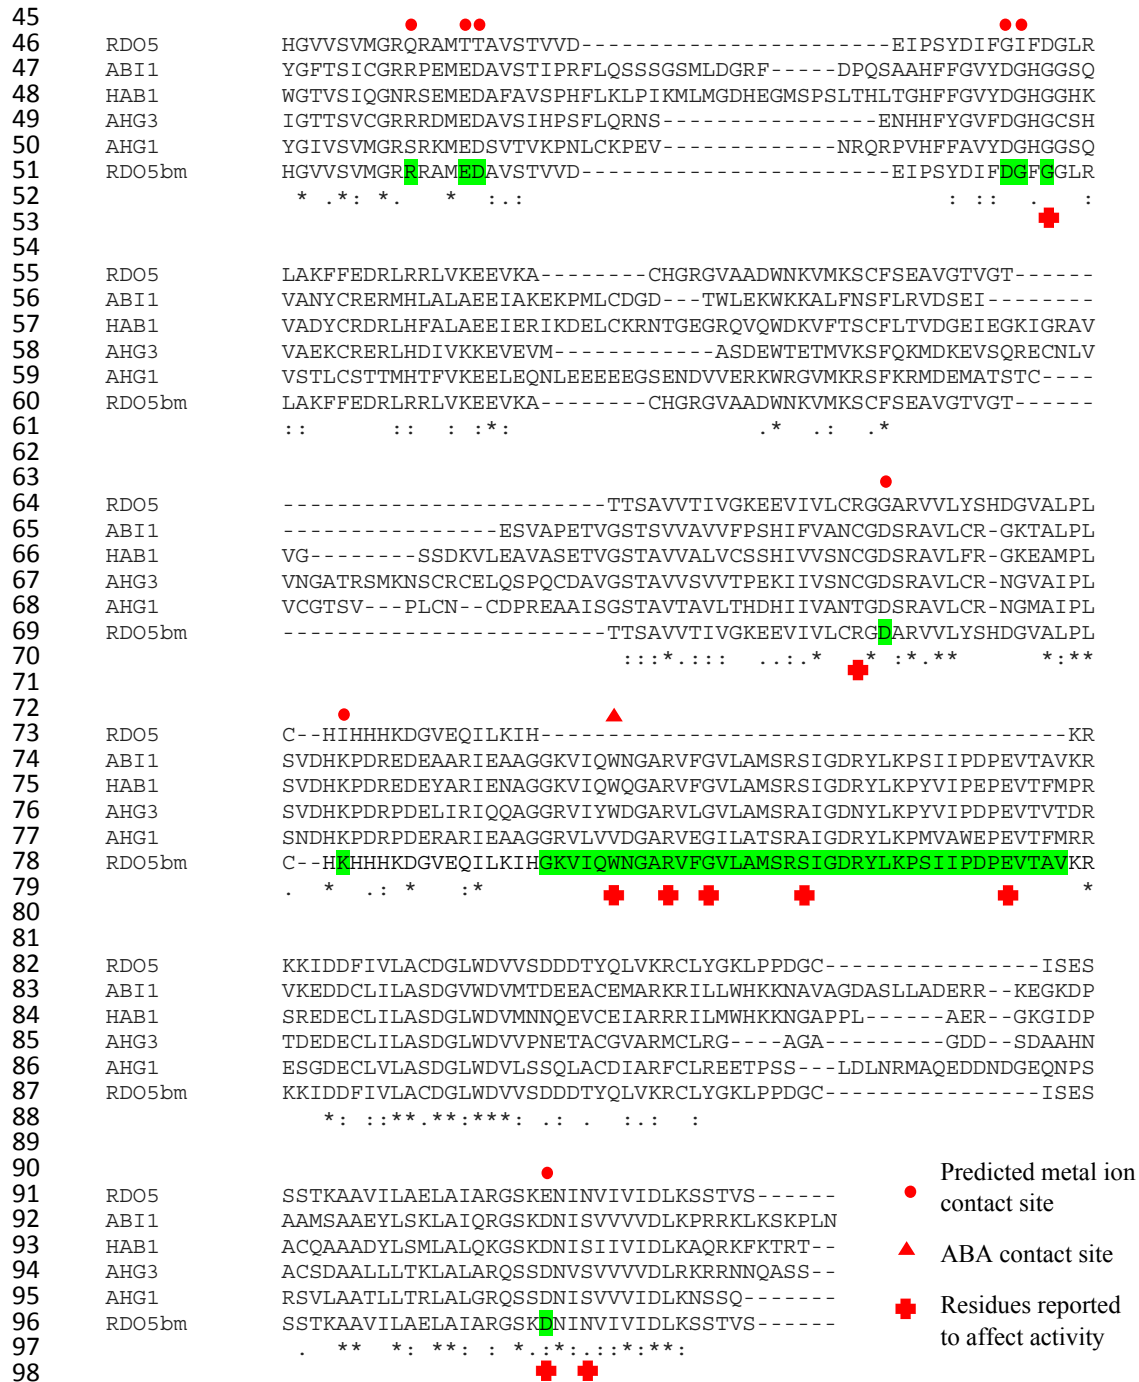

- Predicted metal ion contact site
- ▲ ABA contact site
- +- Residues reported to affect activity

**Supplemental Figure 6. RDO5 sequence analysis.** Sequence alignment of RDO5 and four Arabidopsis PP2C clade A phosphatases. The back-mutated RDO5 protein (RDO5bm) is added at the bottom for comparison. Red circles indicate the amino acids important for metal ions coordination. Red arrows indicate the reported amino acid residues required for PP2C activity and triangle points the conserved W (W385 in HAB1) in PP2C clade A that is needed for ABA sensing and stable interaction with ABA receptor. The alignment was performed using online ClusterW2 tools with default settings (<http://www.ebi.ac.uk/Tools/msa/clustalw2/>). Asterisks indicate fully conserved residues. Colons and periods indicate strong and weak similarity, respectively.

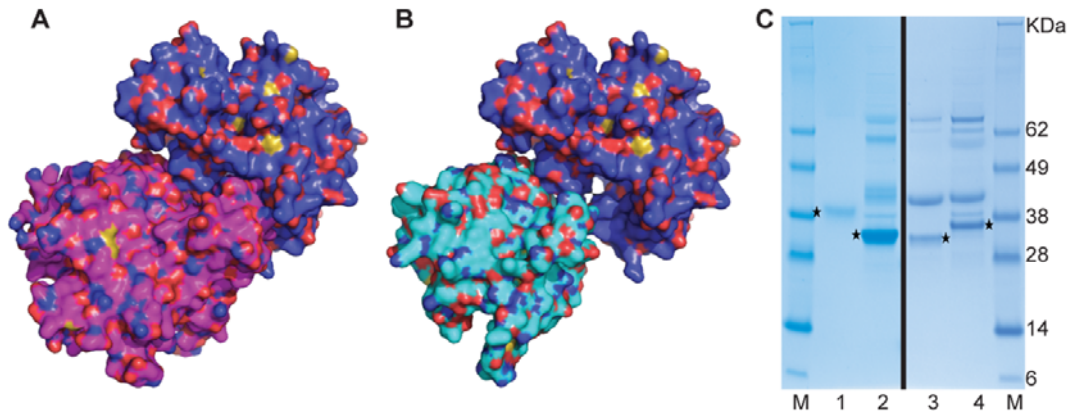

111

112 **Supplemental Figure 7. RDO5 topology structure analysis and SDS PAGE gel of purified**  
 113 **proteins.**

114 (A) Crystal structure of the HAB1/SnrRK2.6 complex (PDB: 3ujg). Figures were made using PyMOL  
 115 (<http://pymol.sourceforge.net/>) and protein surface are shown.

116 (B) 3-D Model of the RDO5 obtained by using Swiss-model (<http://swissmodel.expasy.org>). The  
 117 RDO5 model was superimposed on the known structure of HAB1/SnrRK2.6 (PDB: 3ujg) using  
 118 PDBeFold (<http://www.ebi.ac.uk/msd-srv/ssm/>) to look at the possibility for interaction with SnRK2.6.  
 119 The RDO5 model surface is shown in light blue and the surfaces of HAB1 and SNRK2.6 are shown in  
 120 magenta and blue respectively.

121 (C) SDS PAGE gel showing purified AHG3 and RDO5 related proteins. M, Invitrogen SeeBlue Plus2  
 122 Pre-stained Protein Standard; 1, purified AHG3 with HIS tag; 2, purified RDO5-Ler with HIS tag; 3,  
 123 purified RDO5-Ler; 4, purified back mutated RDO5 (RDO5bm). Stars indicate target proteins. The 42  
 124 KDa proteins in line 3-4 are His-MBP tags obtained after cleavage by TEV protease after purification.  
 125

126

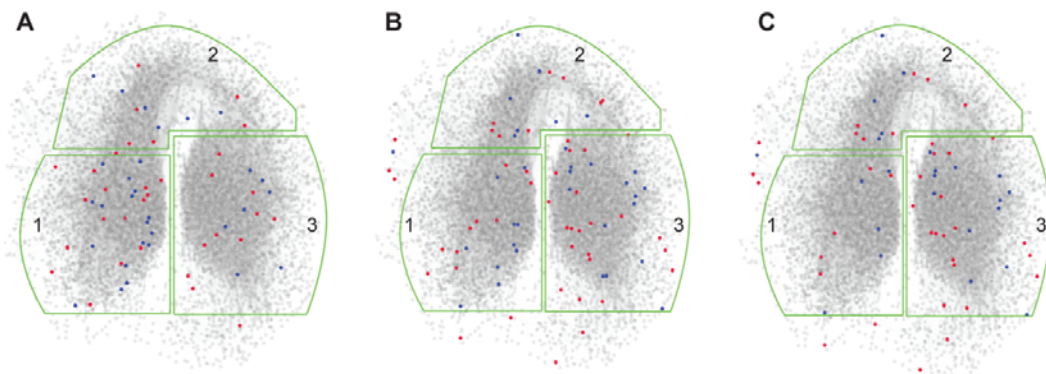

127

128 **Supplemental Figure 8. Localization of differently expressed proteins in the SeedNet network**  
 129 **after 6 hours imbibition.**

130 **Wild-type NIL DOG1 (A),** *rdo5-1* (B) and potential RDO5 specific targets (C). The regions outlined  
 131 in green correspond to clusters associated with dormancy (region 1) or germination (regions 2 and 3).  
 132 The red dots represent the proteins with decreased levels, and the blue dots represent the proteins with  
 133 increased levels.  
 134

**Supplemental Table 1.** Information of 42 loss-of-function *DOG18* accessions including mutation type, accession name, ID, country, origin, habitat, latitude and longitude of collection site.

| <b>Mutation Type</b> | <b>Abbreviated Name</b> | <b>Stock ID</b> | <b>Latitude</b> | <b>Longitude</b> | <b>Country</b> | <b>Location</b>               | <b>Habitat</b>             |
|----------------------|-------------------------|-----------------|-----------------|------------------|----------------|-------------------------------|----------------------------|
| Non-sense mutation   | POG-0                   | N28650          | 49.2655         | -123.2060        | Canada         | Point Grey, British Columbia  | field border               |
| Non-sense mutation   | CATS-6                  | N76760          | 50.7900         | 2.6900           | France         | Mont des Cats                 | perennial meadow           |
| Non-sense mutation   | Com-1                   | N28193          | 49.4160         | 2.8230           | France         | Compiegne                     | garden                     |
| Non-sense mutation   | CON-7                   | N76781          | 47.2364         | 4.4314           | France         | Conforgien                    | river bank                 |
| Non-sense mutation   | GEN-8                   | N76877          | 50.5900         | 3.3000           | France         | Genech                        | cultivated field           |
| Non-sense mutation   | TueV13                  | N76407          | 48.5232         | 9.5198           | Germany        | Tubingen - Volksbank          |                            |
| Non-sense mutation   | Tu-KB-6                 |                 | 48.5200         | 9.0500           | Germany        | Tubingen (central)            | stone paved road           |
| Non-sense mutation   | Tu-Wa1-2                | N76405          | 48.5342         | 9.0345           | Germany        | Tubingen - Wanne              |                            |
| Non-sense mutation   | Abd_0                   | N76429          | 57.1539         | -2.2207          | United Kingdom | Aberdeen, Kingswells          |                            |
| Non-sense mutation   | Gol-2                   | N28974          | 57.9672         | -3.9672          | United Kingdom | Golspie, Scotland             |                            |
| Non-sense mutation   | HR-10                   | N28355          | 51.4083         | -0.6383          | United Kingdom | HR Ascot                      |                            |
| Non-sense mutation   | NFA-10                  | N28533          | 51.4083         | -0.6383          | United Kingdom | Ascot                         |                            |
| Non-sense mutation   | NFA-8                   | N28532          | 51.4083         | -0.6383          | United Kingdom | Ascot                         |                            |
| Non-sense mutation   | UKNW06-403              | N78797          | 54.7000         | -3.4000          | United Kingdom | Cockermouth                   |                            |
| Non-sense mutation   | UKSE06-118              | N78799          | 51.3000         | 0.5000           | United Kingdom | East Malling Research Station |                            |
| Non-sense mutation   | UKSW06-179              |                 | 50.4000         | -4.9000          | United Kingdom | St Columb                     |                            |
| Non-sense mutation   | UKSW06-226              |                 | 50.4000         | -4.9000          | United Kingdom | St Dennis                     |                            |
| Non-sense mutation   | UKSW06-285              | N78811          | 50.3000         | -4.9000          | United Kingdom | St Stephens                   |                            |
| Non-sense mutation   | UKSE06-470              | N78804          | 51.2000         | 0.4000           | United Kingdom | Paddock Wood                  |                            |
| Non-sense mutation   | UKSE06-533              | N78806          | 51.3000         | 1.1000           | United Kingdom | Canterbury                    | house garden               |
| Non-sense mutation   | Vind-1                  | N28803          | 54.9902         | -2.3671          | United Kingdom | Vindolanda                    | near Vindolanda restaurant |
| Non-sense mutation   | LP3413.41               | N77053          | 41.6862         | -86.8513         | USA            | Michigan City                 |                            |
| Non-sense mutation   | Cnt-1.5726              |                 | 51.3000         | 1.1000           | United Kingdom | Canterbury                    |                            |
| Indels               | An-1                    | N28015          | 51.2167         | 4.4000           | Belgium        | Antwerpen                     | Botanic Garden             |
| Indels               | Ri-0                    |                 | 49.1632         | -123.1370        | Canada         | Ri                            |                            |
| Indels               | Cam-61                  | N76108          | 48.2667         | -4.5833          | France         | CAM                           |                            |

|                         |            |        |         |         |                |                                             |                             |
|-------------------------|------------|--------|---------|---------|----------------|---------------------------------------------|-----------------------------|
| Indels                  | Lac-3      | N76157 | 47.7000 | 6.8167  | France         | LAC                                         |                             |
| Indels                  | WAV-8      |        | 50.6500 | 2.9900  | France         | Wavrin                                      | garden                      |
| Indels                  | Sp-0       | N28743 | 52.5339 | 13.1810 | Germany        | Berlin/Spandau                              |                             |
| Indels                  | ICE163     | N76353 | 46.3716 | 11.2376 | Italy          | Altenburg                                   | stark                       |
| Indels                  | Fei-0      | N28250 | 40.9200 | -8.0400 | Portugal       | St. Maria d. Feiria                         |                             |
| Indels                  | Oemoe2-1   |        | 56.1481 | 15.8199 | Sweden         | OeMoe2                                      |                             |
| Indels                  | 11C1       | N76640 | 55.8877 | 3.2107  | United Kingdom | Hillend                                     | Sandy loam with pine litter |
| Indels                  | Durh-1     | N28215 | 54.7761 | -1.5733 | United Kingdom | Durham -bot garden                          | botanical garden            |
| Indels                  | UKNW06-003 |        | 54.5000 | -3.0000 | United Kingdom | Dove Cottage, Wordsworth Trust, nr Grasmere |                             |
| Indels                  | UKNW06-481 |        | 54.4000 | -2.9000 | United Kingdom | Windemere                                   |                             |
| Deletions               | HOV3-2     |        | 56.1000 | 13.7400 | Sweden         | Hov3                                        |                             |
| Deletions               | Love-1     |        | 62.8010 | 18.0790 | Sweden         | Loev                                        |                             |
| Deletions               | Vaar2-6    | N28799 | 55.5800 | 14.3340 | Sweden         | Varhallarna, S Sweden (Skane)               |                             |
| Deletions               | Tny-04     |        | 62.9600 | 18.2844 | Sweden         | TNY                                         |                             |
| Gene loss               | Fr-2       | N28266 | 50.1102 | 8.6822  | Germany        | Frankfurt                                   | Botanic Garden              |
| Splicing site mutations | Boot-1     | N28091 | 54.4000 | -3.2667 | United Kingdom | Boot, Eskdale                               | parking lot pub             |

135

136

137

138

139

140

141 **Supplemental Table 2.** Overview of quantitative mass spectrometry results. Number of quantified  
 142 protein groups in total extract as well as phosphoprotein groups, phosphopeptides and phosphorylation  
 143 sites are given for each condition separately and for all samples combined. Proteins and phosphosites  
 144 were required to be quantified in at least two replicates of at least one condition. High confidence  
 145 phosphosites were filtered for a localization probability > 0.75.

|                    | Total extract<br>protein groups | TiO <sub>2</sub> enriched fractions |                      |                                         |      |
|--------------------|---------------------------------|-------------------------------------|----------------------|-----------------------------------------|------|
|                    |                                 | Phospho-<br>Protein groups          | Phospho-<br>peptides | Phosphosites<br>Total   High confidence |      |
| NIL-DOG1 ds        | 4949                            | 854                                 | 1264                 | 1458                                    | 1253 |
| NIL-DOG1 6HAI      | 4941                            | 691                                 | 952                  | 1075                                    | 929  |
| <i>rdo5-1</i> ds   | 4950                            | 858                                 | 1279                 | 1479                                    | 1258 |
| <i>rdo5-1</i> 6HAI | 4925                            | 667                                 | 919                  | 1033                                    | 896  |
| All samples        | 5017                            | 875                                 | 1308                 | 1527                                    | 1290 |

146

147

148

149 **Supplemental Table 3.** Overview of regulated phosphosites and phosphorylated protein groups. Fold  
 150 changes greater than 2 (log<sub>2</sub> ratio > 1 for upregulated or < -1 for downregulated sites or proteins,  
 151 respectively) were required. Significantly regulated sites or proteins either had a t-test p value < 1% or  
 152 where quantified in at least two replicates of one condition and not quantified in any replicate of the other  
 153 condition. High confidence phosphosites were filtered for a localization probability > 0.75. Reliably  
 154 regulated phosphosites are both significantly regulated localized with high confidence.

|                          | Log <sub>2</sub> ratio | Protein groups |             | Phosphosites |          | Phosphoprotein groups |             |
|--------------------------|------------------------|----------------|-------------|--------------|----------|-----------------------|-------------|
|                          |                        | Total          | Significant | Total        | Reliable | Total                 | Significant |
| NIL-DOG1 6HAI vs ds      | > 1                    | 197            | 41          | 124          | 26       | 63                    | 21          |
|                          | < -1                   | 234            | 65          | 832          | 380      | 491                   | 238         |
| <i>rdo5-1</i> 6HAI vs ds | > 1                    | 197            | 48          | 75           | 23       | 49                    | 17          |
|                          | < -1                   | 243            | 84          | 1135         | 529      | 629                   | 285         |

155

156



**Supplemental Table 4.** Primers used in this study.

| <b>Name</b>            | <b>Primer sequence</b>                                             | <b>Purpose</b>                                                                   |
|------------------------|--------------------------------------------------------------------|----------------------------------------------------------------------------------|
| <i>DOG18F</i> (XmnI)   | GGAGATGTTGGGACATCAGAAGGAACACACGTTTTAGTCGATGCAC                     | dCAPs marker for <i>DOG18</i> Fei-0 allele                                       |
| <i>DOG18R</i> (XmnI)   | TGTCGTCCCATGACTGAGACTACACCGTGGCCGGCGaaTGTTT                        |                                                                                  |
| Q18-6100K-F(BamHI)     | TGTTGAAAACATCGAAATTGTTG                                            |                                                                                  |
| Q18-6100K-R(BamHI)     | GTCCTATTTTTCAACTAAACGAGTG                                          |                                                                                  |
| Q18-6410K-F(DdeI)      | TTCAGCTTTAACACTTTCCATGC                                            |                                                                                  |
| Q18-6410K-R(DdeI)      | ATGTGGTGTGTGATGGGAAAA                                              |                                                                                  |
| Q18-7000K-F(HincII)    | TTCGAATTCAGACCCGAAAC                                               | dCAPs marker for <i>DOG18</i> map based cloning                                  |
| Q18-7000K-R(HincII)    | TGCCTCAAGGGATGAGGTAT                                               |                                                                                  |
| Q18-7130K-F(HindIII)   | CTTGTTGGAGCACCTTCTGG                                               |                                                                                  |
| Q18-7130K-R(HindIII)   | CATCATGTTGCTATTCTCTGCTG                                            |                                                                                  |
| Q18-6917K-F(SspI)      | TGTCGGTGCTTTCGTTCCA                                                |                                                                                  |
| Q18-6917K-R(SspI)      | CTATGGCACAAACGTTTGGGA                                              |                                                                                  |
| Q18-6645K-F(BccI)      | TTTTTGGACACAAAACCACAA                                              | <i>RDO5</i> cDNA amplify from <i>Ler</i> and Fei-0 for protein expression        |
| Q18-6645K-R(BccI)      | GAGATTTTACACTCATCGTTCCAA                                           |                                                                                  |
| <i>RDO5</i> -F         | AAAAAGCAGGCTTCATGAAAACGGATACTACTCTACCCA                            |                                                                                  |
| <i>RDO5</i> -R         | AGAAAGCTGGGTAAAACCTAAGAAACGGTAGAGCTTTTG                            |                                                                                  |
| <i>RDO5</i> TEV-attBF  | AAAAAGCAGGCTAT <u>GAAAACCTGTATTTTCAGGGC</u> AAAACGGATACTACTCTACCCA |                                                                                  |
| <i>RDO5</i> TEV-attBR  | AGAAAGCTGGGTAAAACCTAAGAAACGGTAGAGCTTTTG                            |                                                                                  |
| <i>AHG3</i> -F         | AAAAAGCAGGCTATAATTCAAATTCTGTTACG                                   | <i>AHG3</i> cDNA amplify for protein expression                                  |
| <i>AHG3</i> -R         | AGAAAGCTGGGTACACTAATTATTAAGACGACG                                  |                                                                                  |
| <i>RDO5</i> promoter-F | AAAAAGCAGGCTTCTCGCAATCAGTTGGAGTAAA                                 | <i>RDO5</i> cloning with native promoter for <i>DOG18</i> -Fei-0 complementation |
| <i>RDO5</i> promoter-R | GTTTTCATCTTGTTCATCGTCATCCTTGTAGTCCATGATAACAACCTCCTTTTA             |                                                                                  |
| <i>RDO5</i> cDNA-F     | GACGATGACAAG ATGAAAACGGATACTACTCT                                  |                                                                                  |
| <i>RDO5</i> cDNAHA -R  | AGAAAGCTGGGTCTAAGCGTAATCTGGAACATCGTATGGGTAAGAAACGGTAGAGCT          |                                                                                  |
